# Supplementary material for: Subtle Alterations in PCNA-Partner Interactions Severely Impair DNA Replication and Repair
Source: PLOS journal article supplement (doi:10.1371/journal.pbio.1000507), 2010-10-12

Figure S3

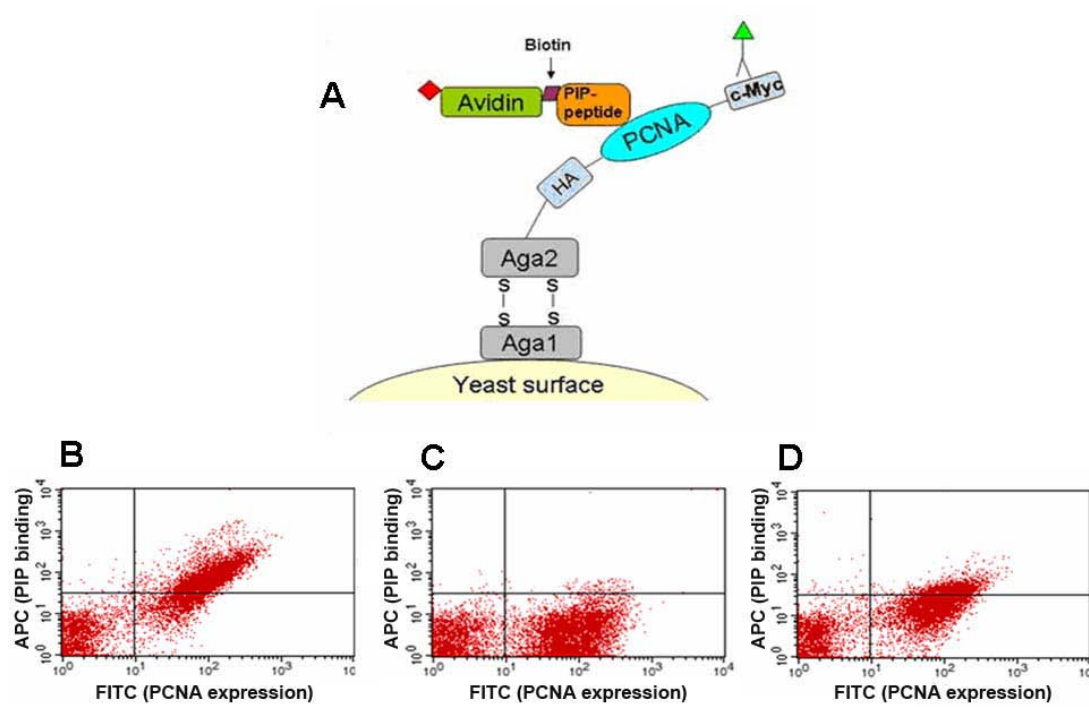

Supplement: S3 (10.1371/journal.pbio.1000507.s003) [file journal.pbio.1000507.s003]
